# Supplementary material for: Intracranial pressure elevation alters CSF clearance pathways
Source: Springer Nature journal article supplement (doi:10.1186/s12987-020-00189-1), 2020-04-16
Supplement: MOESM2 [file 17902554]

Additional file 2. Parameters from the 2D model used to compute the total resistance in the extracellular space and through inter-endfeet gaps both on the arterial and venous side.

| Parameter                                     | Value                                               |
|-----------------------------------------------|-----------------------------------------------------|
| Computational domain of 2D ECS                | $L = 3.91 \text{ mm}, H = 2.81 \text{ mm}$          |
| Number of arterioles and venules in 2D domain | $N_a = 125, N_v = 50$                               |
| Arteriole and venule radius                   | $r_a = 15\mu\text{m}, r_v = 20\mu\text{m}$          |
| Endfeet thickness                             | $T = 1 \mu\text{m}$                                 |
| Inter-endfeet cleft gaps                      | $h_a = 24 \text{ nm}, h_v = 31 \text{ nm}$ [52, 53] |
| Artery/arteriole and vein/venule area         | $A = 1.64\text{m}^2$                                |
| Total inter-edfeet cleft gap area             | $A_{EF} = 0.003A \approx 0.005 \text{ m}^2$ [53]    |
| Inter-edfeet cleft length along entire vessel | $D = 90.67 \text{ m}$                               |
| Average number of clefts per vessel           | $n_a = 14.14, n_v = 18.85$                          |
